# Supplementary material for: Adding Sea Ice Effects to A Global Operational Model (NEMO v3.6) for Forecasting Total Water Level: Approach and Impact
Source: Copernicus journal article supplement (doi:10.5194/gmd-2023-18), 2023-02-28
Supplement: Supplementary file 1 [file gmd-2023-18-supplement.pdf]

## Summary of seasonal modulations for $M_2$ , $S_2$ , $K_1$ and $O_1$

Figure S1 (right two columns) summarizes the observed and predicted seasonal modulations in March relative to September ( $\Delta\tilde{A}_{\text{Mar}}$ ,  $\Delta\phi_{\text{Mar}}$ ) as a function of station code for four major tidal constituents ( $M_2$ ,  $S_2$ ,  $K_1$  and  $O_1$ ). For reference, the amplitudes in September are also given in the left column. The impact of adding ice effects on  $S_2$  is very similar to that on  $M_2$  (top two rows; see main text for details). We note that the seasonal modulation of  $S_2$  also has a non-negligible astronomical contribution from its neighbouring constituent  $T_2$ , which has one cycle per year (cpy) below  $S_2$ . The amplitude of the astronomical  $T_2$  is about 5.8% of  $S_2$  (Cartwright and Tayler, 1971). The superposition of  $S_2$  and  $T_2$  explains the bulk of the observed  $\Delta\tilde{A}_{\text{Mar}}$  (middle column, second row) of about 7% for  $S_2$  at stations 47-52 and 54-58 in the Gulf of St. Lawrence (We note that at station 53, the signal is also present but the SNR is below 2 and thus neglected). This modulation is missed by our model as it does not include  $T_2$ .

The impacts of adding ice effects for  $K_1$  and  $O_1$  (bottom two rows) are also similar. Large improvements (20–40% in amplitude, 15–40° in phase) are found at station 18 in the Russian Arctic, and stations 6–8 in the CAA except for an overestimated  $\Delta\tilde{A}_{\text{Mar}}$  for  $O_1$  at station 8. Adding ice effects also improves the phase modulation (15–30°) at Nome, Alaska (station 15), but the predicted amplitude modulations are underestimated by about 35% for both  $K_1$  and  $O_1$ . It is not clear if sea ice is indeed responsible for the observed large  $\Delta\tilde{A}_{\text{Mar}}$  at Nome. Another possible mechanism is the river discharge, and in that case the modulation is likely very localized.

For other stations, the impact of adding ice effects is generally negligible, and there are no significant modulations for  $O_1$  in both observations and predictions.  $K_1$ , however, is more complicated: observations show moderate amplitude modulations (7-20%) along the Norwegian coast (stations 23–26), in the HB (stations 37–40) and the Gulf of St. Lawrence (stations 48–58), which are missed or underestimated by both model runs. A year-long analysis of observed TWL reveals anomalously high energy (up to 12% of  $K_1$ ) at neighbouring constituents  $S_1$  and  $\psi_1$ , each 1 cpy from  $K_1$ . As the astronomical  $S_1$  and  $\psi_1$  are known to be small (Ray et al., 2021), the cause is likely due to other processes (e.g., shallow water processes and climate processes, Ray, 2022) that are not fully captured in our model.

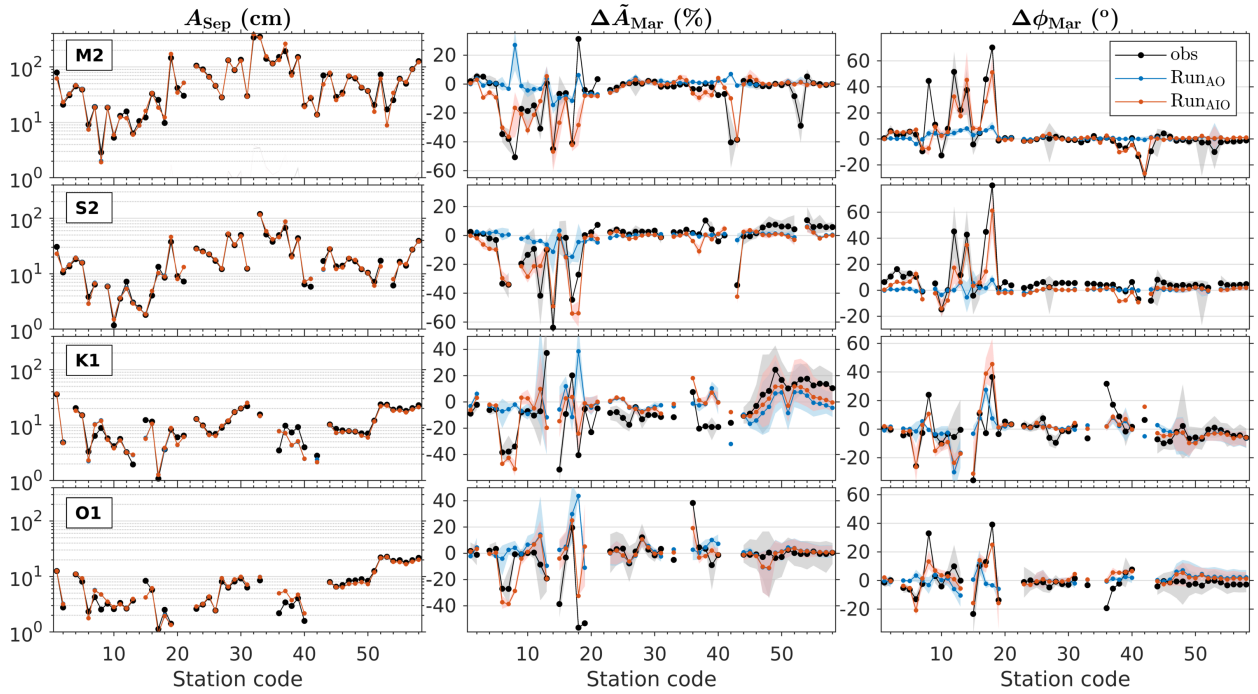

**Figure 1.** Tidal amplitude in September ( $A_{\text{Sep}}$ , left panels), the modulation in amplitude ( $\Delta\tilde{A}_{\text{Mar}}$ , middle panels) and phase ( $\Delta\phi_{\text{Mar}}$ , right panels) in March relative to September for four major tidal constituents ( $M_2$ ,  $S_2$ ,  $K_1$ , and  $O_1$ ) observed and predicted by  $\text{Run}_{\text{AO}}$  and  $\text{Run}_{\text{AIO}}$  (see Fig. 1 for station code). Shaded area indicates the 10-90 percentile range. Only stations with SNR greater than 2 are plotted.

## 25 References

- Cartwright, D. and Tayler, R.: New computations of the tide-generating potential, *Geophysical Journal International*, 23, 45–73, 1971.
- Ray, R.: Technical note: On seasonal variability of the  $M_2$  tide, *EGU*sphere, pp. 1–13, 2022.
- Ray, R., Boy, J., Arbic, B., Egbert, G., Erofeeva, S., Petrov, L., and Shriver, J.: The problematic  $\Psi_1$  ocean tide, *Geophysical Journal International*, 227, 1181–1192, 2021.
